# Supplementary material
Source: publisher site journal article supplement (https://www.dovepress.com/article/283949)
Supplement: Supplementary file 1 [file get_supplementary_file.php]

Table S1. Search strategy for Pubmed

| Concept Step Search Strategy | | |
| --- | --- | --- |
| Outcomes=metabolic syndrome | | |
|  | 1 "Metabolic Syndrome"[Mesh] | |
| 2 (Metabolic Syndromes[Title/Abstract]) OR (Syndrome, Metabolic[Title/Abstract])) OR (Syndromes, Metabolic[Title/Abstract])) OR (Metabolic Syndrome X[Title/Abstract])) OR (Insulin Resistance Syndrome X[Title/Abstract])) OR (Syndrome X, Metabolic[Title/Abstract])) OR (Syndrome X, Insulin Resistance[Title/Abstract])) OR (Metabolic X Syndrome[Title/Abstract])) OR (Syndrome, Metabolic X[Title/Abstract])) OR (X Syndrome, Metabolic[Title/Abstract])) OR (Dysmetabolic Syndrome X[Title/Abstract])) OR (Syndrome X, Dysmetabolic[Title/Abstract])) OR (Reaven Syndrome X[Title/Abstract])) OR (Syndrome X, Reaven[Title/Abstract])) OR (Metabolic Cardiovascular Syndrome[Title/Abstract])) OR (Cardiovascular Syndrome, Metabolic[Title/Abstract])) OR (Cardiovascular Syndromes, Metabolic[Title/Abstract])) OR (Syndrome, Metabolic Cardiovascular[Title/Abstract]) | |
| 3 1 OR 2 | |
| Study type = prediction modelling studies 1 | | |
|  | 4 | (predict*[Title/Abstract]) OR (progn*[Title/Abstract]) OR (risk prediction[Title/Abstract])) OR (risk score[Title/Abstract]) OR (risk calculation[Title/Abstract]) OR (risk assessment[Title/Abstract]) OR (c statistic[Title/Abstract]) OR (discrimination[Title/Abstract]) OR (calibration[Title/Abstract]) OR (AUC[Title/Abstract]) OR (area under the curve[Title/Abstract]) OR (area under the receiver operator characteristic curve[Title/Abstract]) |
| 5 | 3 AND 4 |
| Human filter 2 | 6 | Animals[MH] NOT Humans[MH] |
| 7 | 5 NOT 6 |

References:

1. Bellou V, Belbasis L, Konstantinidis AK, et al. Prognostic models for outcome prediction in patients with chronic obstructive pulmonary disease: systematic review and critical appraisal. BMJ (Clinical research ed) 2019;367:l5358. doi: 10.1136/bmj.l5358 [published Online First: 2019/10/06]

2. Cochrane handbook for systematic reviews of interventions: The Cochrane Collaboration; 2011. Available from: <http://handbook-5-1cochraneorg/>
